# Supplementary material for: Rare PfCSP C-terminal antibodies induced by live sporozoite vaccination are ineffective against malaria infection
Source: PubMed Central journal article supplement — J Exp Med. 2018 Jan 2;215(1):63–75. doi: 10.1084/jem.20170869 (PMC5748854; doi:10.1084/jem.20170869), 2018-01-02
Supplement: JEM_20170869_sm.pdf [file JEM_20170869_sm.pdf]

SUPPLEMENTAL MATERIAL

Sally et al., <https://doi.org/10.1084/jem.20170869>

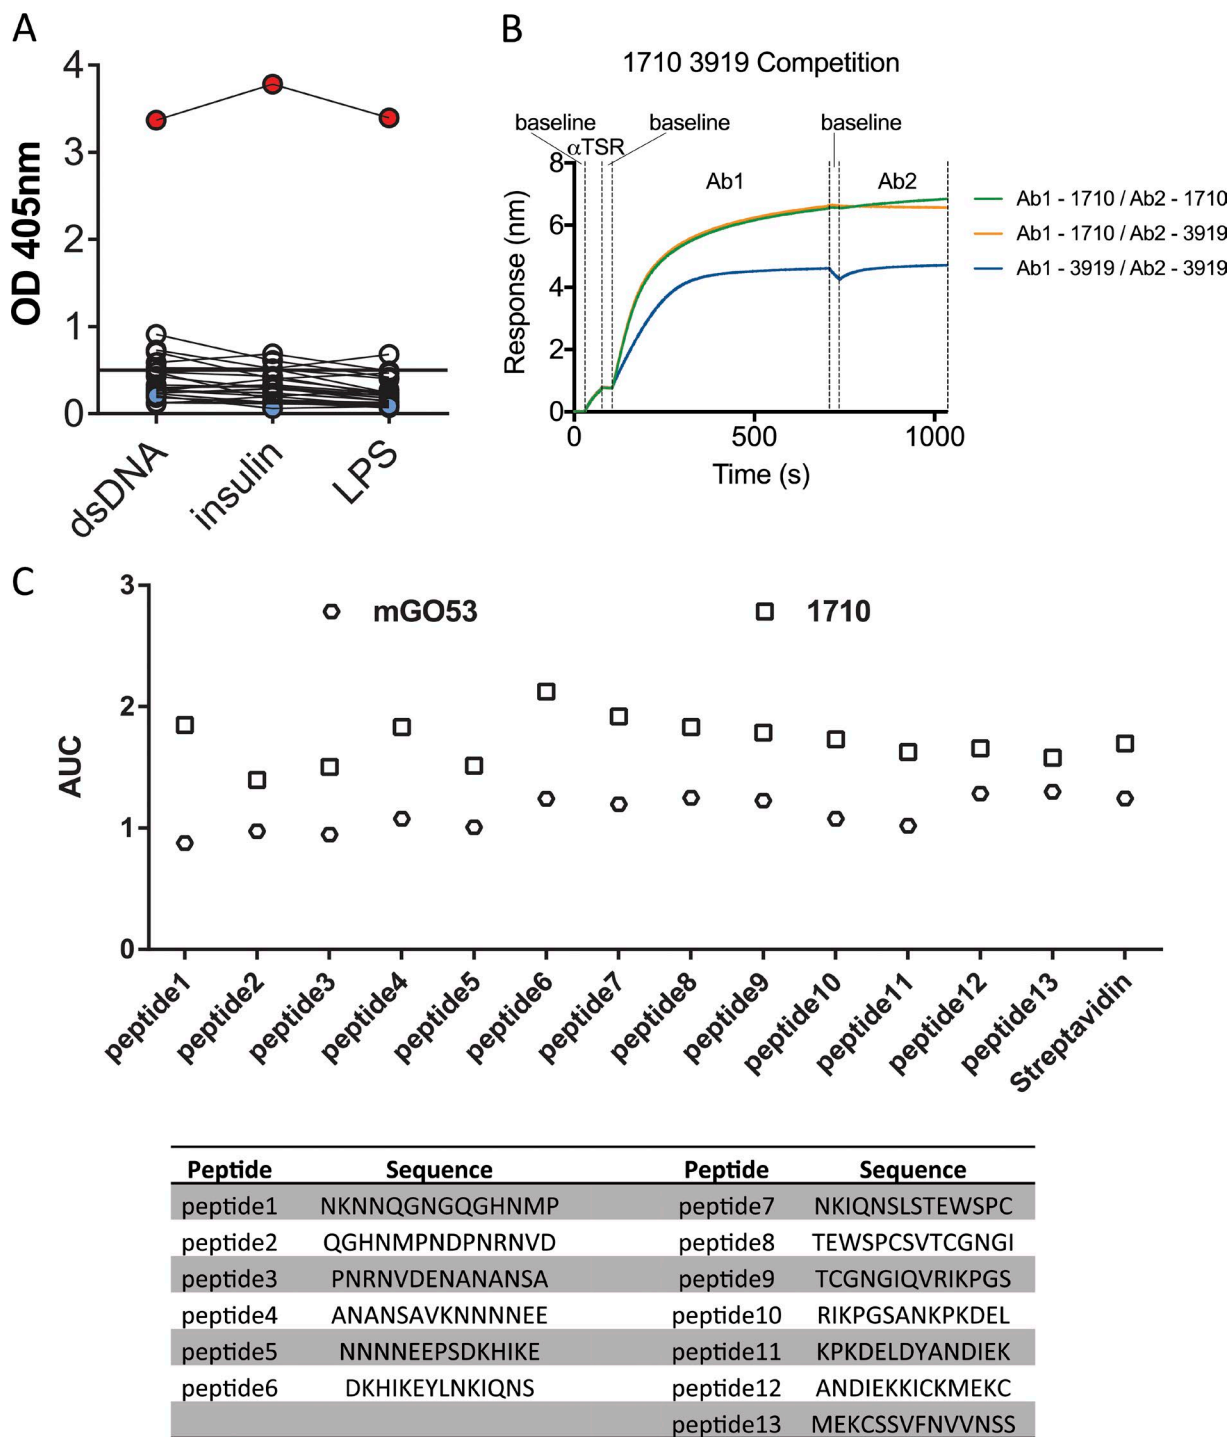

Figure S1. **Characterization of C-PfCSP binding to C-PfCSP-reactive antibodies.** (A) Polyreactivity assessment of C-PfCSP-binding antibodies. C-PfCSP-reactive antibodies were tested for polyreactivity by binding to three different antigens: dsDNA, insulin, and LPS (Wardemann et al., 2003). ED38 (red) and mGO53 (blue) were used as positive and negative controls, respectively. Horizontal line indicates the cutoff OD<sub>405</sub> for positive reactivity for the corresponding antigen. Data are representative of two independent experiments. (B) Competition binding data for 1710 and 3919. Sensorgram for competition binding studies of 1710 and 3919 IgG to the  $\alpha$ TSR (NF54) PfCSP construct. The His-tagged  $\alpha$ TSR domain was first bound to NiNTA biosensors followed by a baseline equilibration. 1710 (green and yellow) or 3919 (blue) were next allowed to bind the antigen. After a baseline step, biosensors were dipped in a competing antibody well (1710, green; 3919, yellow and blue). 1710 competed with 3919 for binding to the  $\alpha$ TSR domain, indicating they share a similar or overlapping binding site. (C) 1710 and isotype control mGO53 were screened for binding to the indicated linear C-PfCSP peptides. Area under the curve is calculated for ELISA curves as in Fig. 1 (B and C). Data are representative of two independent experiments.



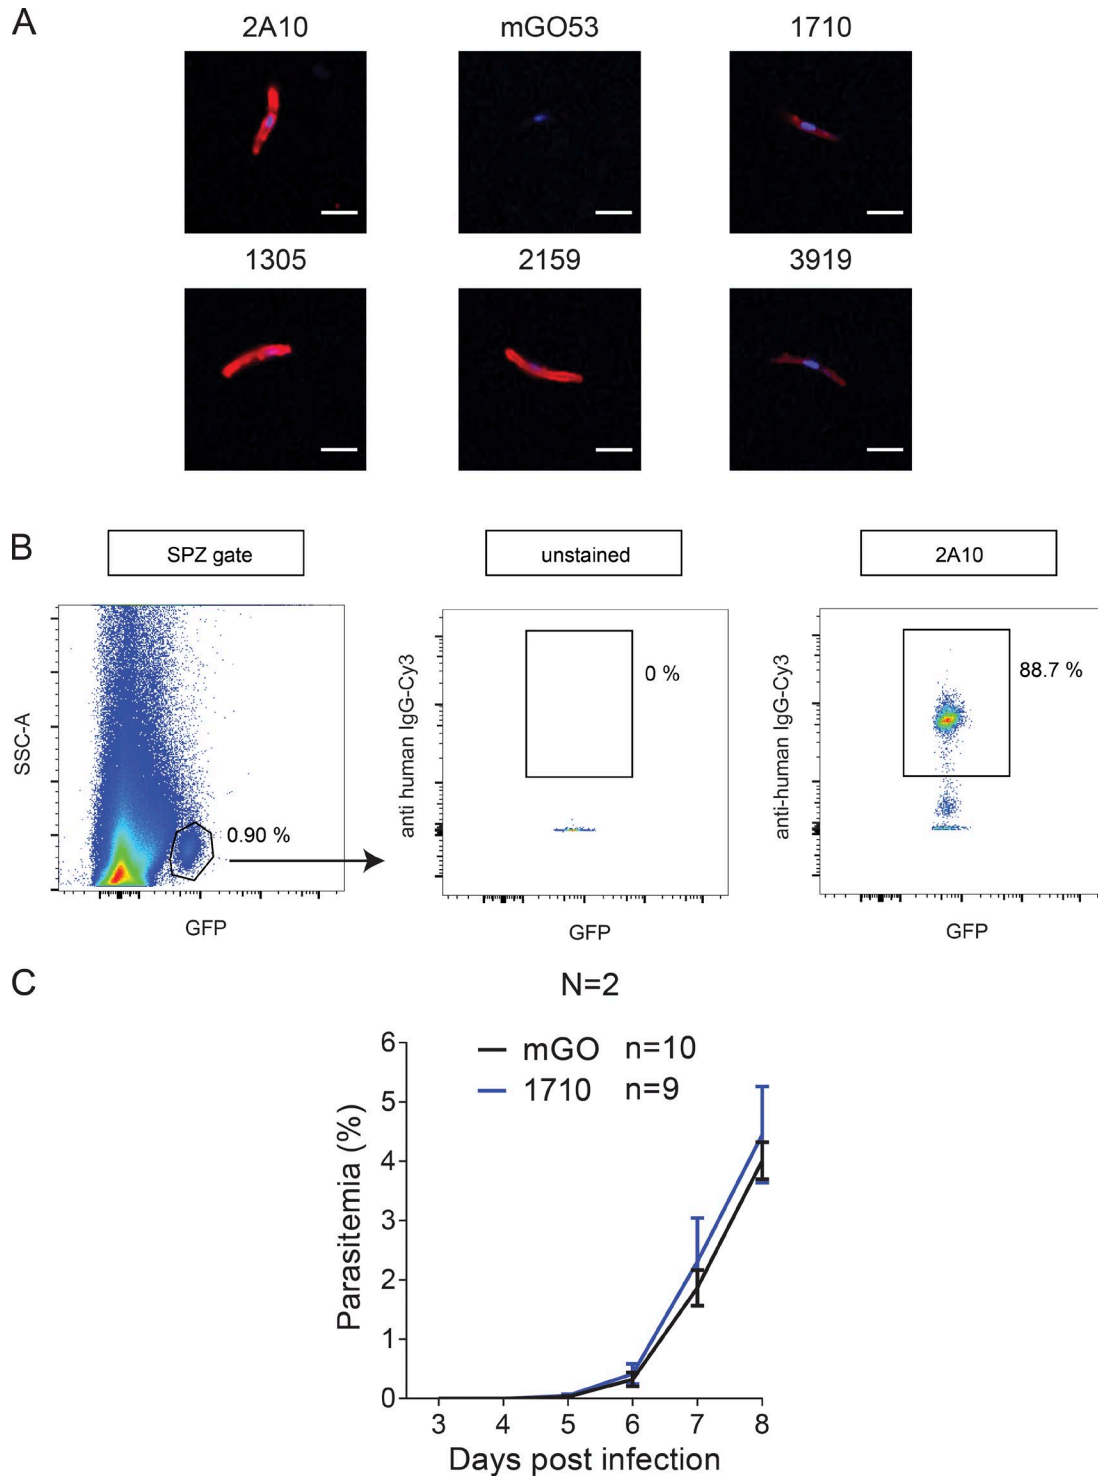

Figure S3. *Pb*-*PfCSP* sporozoite binding and functional evaluation of C-*PfCSP* antibodies. **(A)** Representative immunofluorescence images of fixed *Pf* NF54 salivary gland sporozoites stained with the indicated C-*PfCSP*-reactive antibodies (red) and DAPI (nuclei, blue). 1305 and 2159 are isolated C-*PfCSP*-binding antibodies that also cross-react with the NANP repeat (see Fig. 1). 2A10 and mGO53 were used as positive and negative control, respectively. Bars, 5  $\mu$ m. **(B)** Flow cytometric gating strategy of GFP-positive *Pb*-*PfCSP* sporozoites with indicated frequencies exemplified by 2A10 (Triller et al., 2017). (A and B) Data are representative of two independent experiments. **(C)** Mean blood parasitemia from days 3–7 after infection with *Pb*-*PfCSP* transgenic sporozoites in mice passively immunized with 1710 or mGO53. N indicates the number of mice that developed parasitemia in each group. Data are from two independent experiments. Error bars indicate standard error of the mean.

Table S1. Data collection and refinement statistics for 1710 Fab- $\alpha$ TSR and unliganded 1710 Fab crystal structures

| Parameter                                                          | 1710 Fab- $\alpha$ TSR                        | 1710 Fab                                      |
|--------------------------------------------------------------------|-----------------------------------------------|-----------------------------------------------|
| <b>Wavelength (Å)</b>                                              | 0.97948                                       | 0.97949                                       |
| <b>Space group</b>                                                 | P2 <sub>1</sub> 2 <sub>1</sub> 2 <sub>1</sub> | P2 <sub>1</sub> 2 <sub>1</sub> 2 <sub>1</sub> |
| <b>Cell dimensions</b>                                             |                                               |                                               |
| <i>a, b, c</i> (Å)                                                 | 70.49, 70.68, 96.28                           | 61.06, 66.72, 124.03                          |
| $\alpha, \beta, \gamma$ (°)                                        | 90, 90, 90                                    | 90, 90, 90                                    |
| <b>Resolution (Å)<sup>a</sup></b>                                  | 39.79–1.95 (2.05–1.95)                        | 45–1.9 (2.00–1.90)                            |
| <b>No. molecules in ASU</b>                                        | 1                                             | 1                                             |
| <b>No. unique observations</b>                                     | 35,815 (4,909)                                | 40,776 (5,691)                                |
| <b>Multiplicity</b>                                                | 7.4 (7.4)                                     | 5.4 (5.3)                                     |
| <b>R<sub>merge</sub> (%)<sup>b</sup></b>                           | 15.7 (70.3)                                   | 9.4 (61.9)                                    |
| <b>R<sub>pim</sub> (%)<sup>c</sup></b>                             | 6.2 (29.5)                                    | 4.4 (28.9)                                    |
| <b>&lt;I/σ I&gt;</b>                                               | 11.6 (1.7)                                    | 13.2 (1.9)                                    |
| <b>Completeness (%)</b>                                            | 100 (100)                                     | 99.5 (99.2)                                   |
| <b>CC<sub>1/2</sub></b>                                            | 99.6 (56.8)                                   | 99.8 (64.7)                                   |
| <b>Refinement statistics</b>                                       |                                               |                                               |
| Nonhydrogen atoms                                                  | 4,145                                         | 3,544                                         |
| Macromolecule                                                      | 3,715                                         | 3,244                                         |
| Water                                                              | 377                                           | 240                                           |
| Ligand                                                             | 34                                            | 60                                            |
| <b>R<sub>factor</sub><sup>d</sup>/R<sub>free</sub><sup>e</sup></b> | 18.0/22.3                                     | 18.4/22.0                                     |
| <b>Rms deviations from ideality</b>                                |                                               |                                               |
| Bond lengths (Å)                                                   | 0.003                                         | 0.005                                         |
| Bond angle (°)                                                     | 0.65                                          | 0.77                                          |
| Dihedrals (°)                                                      | 13.0                                          | 13.6                                          |
| <b>Ramachandran plot</b>                                           |                                               |                                               |
| Favored regions (%)                                                | 97.3                                          | 97.2                                          |
| Allowed regions (%)                                                | 2.7                                           | 2.8                                           |
| <b>B-factors (Å<sup>2</sup>)</b>                                   |                                               |                                               |
| Average B-factors                                                  | 26.1                                          | 35.5                                          |
| Average macromolecule                                              | 25.3                                          | 34.6                                          |
| Average ligands                                                    | 47.9                                          | 52.8                                          |
| Average water                                                      | 32.2                                          | 43.2                                          |

<sup>a</sup>Values in parentheses refer to the highest resolution bin.

<sup>b</sup> $R_{\text{merge}} = \sum hkl \sum i |I_{hkl, i} - \langle I_{hkl} \rangle| / \sum hkl \langle I_{hkl} \rangle$ .

<sup>c</sup> $R_{\text{pim}} = \sum hkl [1/(N-1)]^{1/2} \sum i |I_{hkl, i} - \langle I_{hkl} \rangle| / \sum hkl \langle I_{hkl} \rangle$ .

<sup>d</sup> $R_{\text{factor}} = (\sum | |F_o| - |F_c| |) / (\sum | |F_o| |)$  for all data except as indicated in footnote e.

<sup>e</sup>5% of data were used for the  $R_{\text{free}}$  calculation.

## REFERENCES

- Baker, N.A., D. Sept, S. Joseph, M.J. Holst, and J.A. McCammon. 2001. Electrostatics of nanosystems: application to microtubules and the ribosome. *Proc. Natl. Acad. Sci. USA*. 98:10037–10041. <https://doi.org/10.1073/pnas.181342398>
- MOE. 2013. Molecular Operating Environment (MOE), 2013.08. *Chemical Computing Group*. Available at: <https://www.chemcomp.com/MOE2013.htm>
- Sievers, F., A. Wilm, D. Dineen, T.J. Gibson, K. Karplus, W. Li, R. Lopez, H. McWilliam, M. Remmert, J. Söding, et al. 2011. Fast, scalable generation of high-quality protein multiple sequence alignments using Clustal Omega. *Mol. Syst. Biol.* 7:539. <https://doi.org/10.1038/msb.2011.75>
- Triller, G., S.W. Scally, G. Costa, M. Pissarev, C. Kreschel, A. Bosch, E. Marois, B.K. Sack, A.M. Salman, C.J. Janse, et al. 2017. Protective human anti-malarial antibodies induced by natural exposure. *Immunity*. <https://doi.org/10.1016/j.immuni.2017.11.007>
- Wardemann, H., S. Yurasov, A. Schaefer, J.W. Young, E. Meffre, and M.C. Nussenzweig. 2003. Predominant autoantibody production by early human B cell precursors. *Science*. 301:1374–1377. <https://doi.org/10.1126/science.108690712920303>
